# Supplementary material
Source: HighWire-hosted journal article supplement (https://bmjopen.bmj.com/content/7/3/e013076)
Supplement: inline-supplementary-material-2 [file inline-supplementary-material-2.pdf]

## **Supplementary file S2**

### **Search strategy MEDLINE**

- 1 Patient Education as Topic/
- 2 exp Self Care/
- 3 Self Efficacy/
- 4 ((patient\* or consumer\* or client\*) adj3 (educat\* or train\* or teach\* or instruct\* or skill\*)).tw.
- 5 (self care or self management or self efficacy or self monitoring).tw.
- 6 patient participation/
- 7 empowerment.tw.
- 8 (self adj (monitor\* or manag\* or care)).tw.
- 9 motivation/
- 10 (patient\* adj2 (activation or psychosocial support or social support)).tw.
- 11 (collaborative decision making\* or shared decision making\*).tw.
- 12 or/1-11 (230620)
- 13 exp Education, Continuing/
- 14 Pamphlets/
- 15 Advance Directives/
- 16 (leaflet? or booklet? or poster or posters).tw.
- 17 ((written or printed or oral) adj information).tw.
- 18 Guideline Adherence/

- 19 (education\* adj2 (program\* or intervention\* or meeting\* or session\* or strateg\* or workshop\* or visit\*)).tw.
- 20 (behavio?r\* adj2 intervention\*).tw.
- 21 (education\* adj1 (method? or material?)).tw.
- 22 ((opinion or education\$ or influential) adj1 leader?).tw.
- 23 facilitator?.tw.
- 24 academic detailing.tw.
- 25 consensus conference?.tw.
- 26 (guideline? adj2 (introduc\* or issu\* or impact or effect\* or disseminat\* or distribut\*)).tw.
- 27 ((effect\* or impact or evaluat\* or introduc\* or compar\*) adj2 training program\*).tw.
- 28 practice guidelines as topic/
- 29 telemedicine/
- 30 ((effect? or impact or evaluat\* or introduce\* or compar\*) adj2 (care program\* or (prevent\* adj program\*))).tw.
- 31 guidelines as topic/
- 32 ((patient\* or practice) adj guideline?).tw.
- 33 or/13-32
- 34 exp Patient Care planning/
- 35 Nurse clinicians/
- 36 Ambulatory Care/
- 37 Office Visits/

- 38 (nurse adj (clinician? or practitioner?)).tw.
- 39 (team? adj2 (care or treatment or assessment or consultation)).tw.
- 40 (integrat\* adj2 (care or service?)).tw.
- 41 (care adj2 (coordinat\* or program\* or continuity)).tw.
- 42 (case adj1 management).tw.
- 43 outreach.tw.
- 44 disease management.tw.
- 45 disease management/
- 46 patient care team/
- 47 exp ambulatory care facilities/
- 48 nurse practitioners/
- 49 ((share\* or step\*) adj care).tw.
- 50 community matron\*.tw.
- 51 or/34-50
- 52 Reminder Systems/
- 53 Medical Records/
- 54 Medical Records Systems, Computerized/
- 55 (register? or registry or registries).tw.
- 56 reminder?.tw.
- 57 (recall adj2 system\*).tw.

- 58 (prompter? or prompting).tw.
- 59 chart review\*.tw.
- 60 ((effect? or impact or records or chart?) adj2 audit).tw.
- 61 (information adj2 (management or system?)).tw.
- 62 hospital information systems/
- 63 ambulatory care information systems/
- 64 management information systems/
- 65 decision support systems, clinical/
- 66 ((introduce\$ or impact or effect? or implement\$ or computer\$) adj2 protocol?).tw.
- 67 Feedback/ or feedback.tw.
- 68 (feedback adj1 (loop? or control? or regula\* or mechanism? or inhib\* or system? or circuit? or sensory or visual or audio\* or auditory)).tw.
- 69 67 not 68
- 70 or/52-66,69
- 71 Reimbursement, incentive/
- 72 exp Reimbursement mechanisms/
- 73 Capitation Fee/
- 74 Physician Incentive Plans/
- 75 "Salaries and Fringe Benefits"/
- 76 Physician's Practice Patterns/
- 77 (quality adj (improvement or management or assurance)).tw.

- 78 ((continuous or total) adj quality).tw.
- 79 quality of health care/
- 80 quality assurance, health care/
- 81 total quality management/
- 82 quality improvement/
- 83 quality indicators, health care/
- 84 program evaluation/
- 85 technology assessment, biomedical/
- 86 exp Standard of care/
- 87 or/71-86
- 88 exp Diabetes Mellitus, Type 2/
- 89 exp Diabetes Complications/
- 90 (obes\* adj3 diabet\*).tw.
- 91 (MODY or NIDDM or T2DM or T2D).tw.
- 92 (non insulin\* depend\* or noninsulin\* depend\* or noninsulin?depend\* or non insulin?depend\*).tw.
- 93 ((typ? 2 or typ? II or typ?2 or typ?II) adj3 diabet\*).tw.
- 94 ((adult\* or matur\* or late or slow or stabl\*) adj3 diabet\*).tw.
- 95 or/88-94
- 96 exp Diabetes Insipidus/
- 97 diabet\* insipidus.tw.

98 or/96-97

99 95 not 98

100 infan\*.tw.

101 (newborn\* or new born\*).tw.

102 (perinat\* or neonat\*).tw.

103 (baby\* or babies).tw.

104 toddler\*.tw.

105 (boy or boys or boyhood).tw.

106 girl\*.tw.

107 kid?.tw.

108 (child\* or schoolchild\*).tw.

109 adolescen\*.tw.

110 juvenil\*.tw.

111 youth\*.tw.

112 teen\*.tw.

113 pubescen\*.tw.

114 Pediatrics/

115 p?ediatric\*.tw.

116 school?.tw.

117 or/100-116

118 exp africa/  
119 exp americas/  
120 exp asia/  
121 exp oceania/  
122 or/118-121  
123 randomized controlled trial.pt.  
124 controlled clinical trial.pt.  
125 randomized.ab.  
126 placebo.ab.  
127 drug therapy.fs.  
128 randomly.ab.  
129 trial.ab.  
130 groups.ab.  
131 exp animals/ not humans/  
132 or/123-130  
133 132 not 131  
134 or/12,33,51,70,87  
135 134 and 99 and 133  
136 135 not 117 not 122  
137 limit 136 to (english language and yr="2000 -Current")
